# Supplementary material
Source: PubMed Central journal article supplement (PMC6295271)
Supplement: NIHMS999083-supplement-1.pdf [file NIHMS999083-supplement-1.pdf]

SUPPLEMENTAL ONLINE ONLY MATERIAL

**Figure S1: Study Population Flow Diagram**

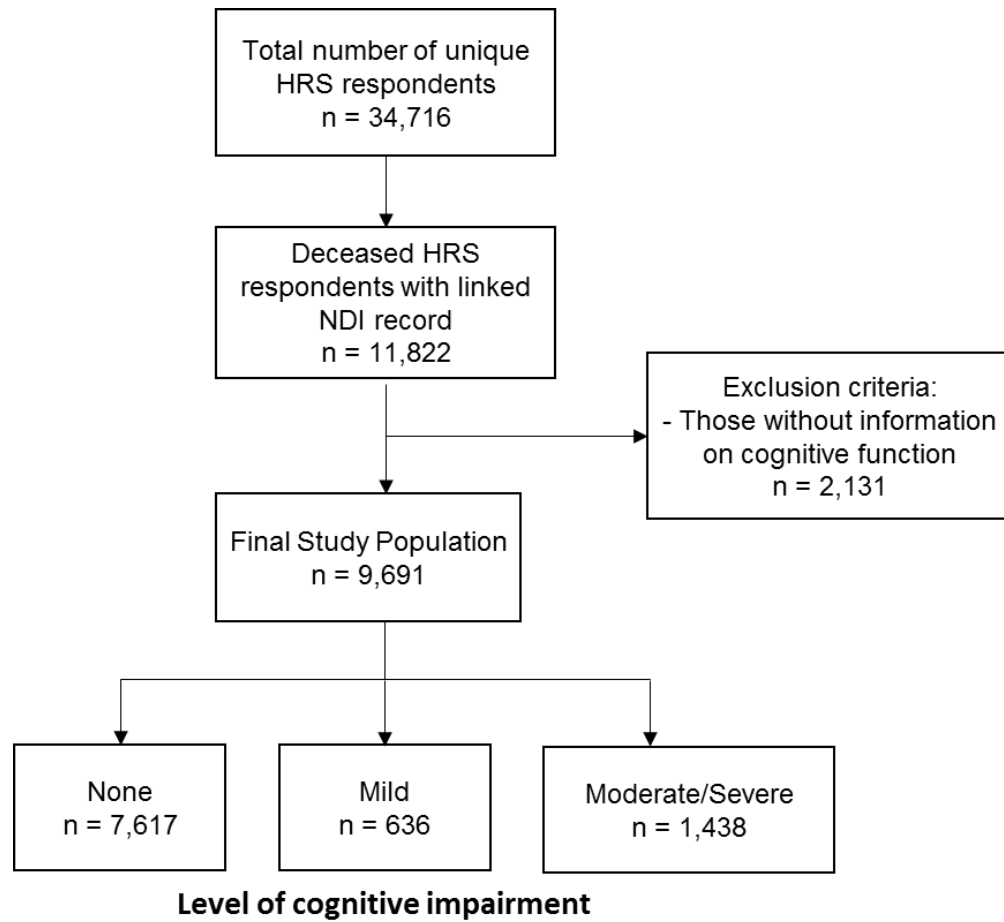

**Figure S2: Distribution of cause of death among those with no cognitive impairment**

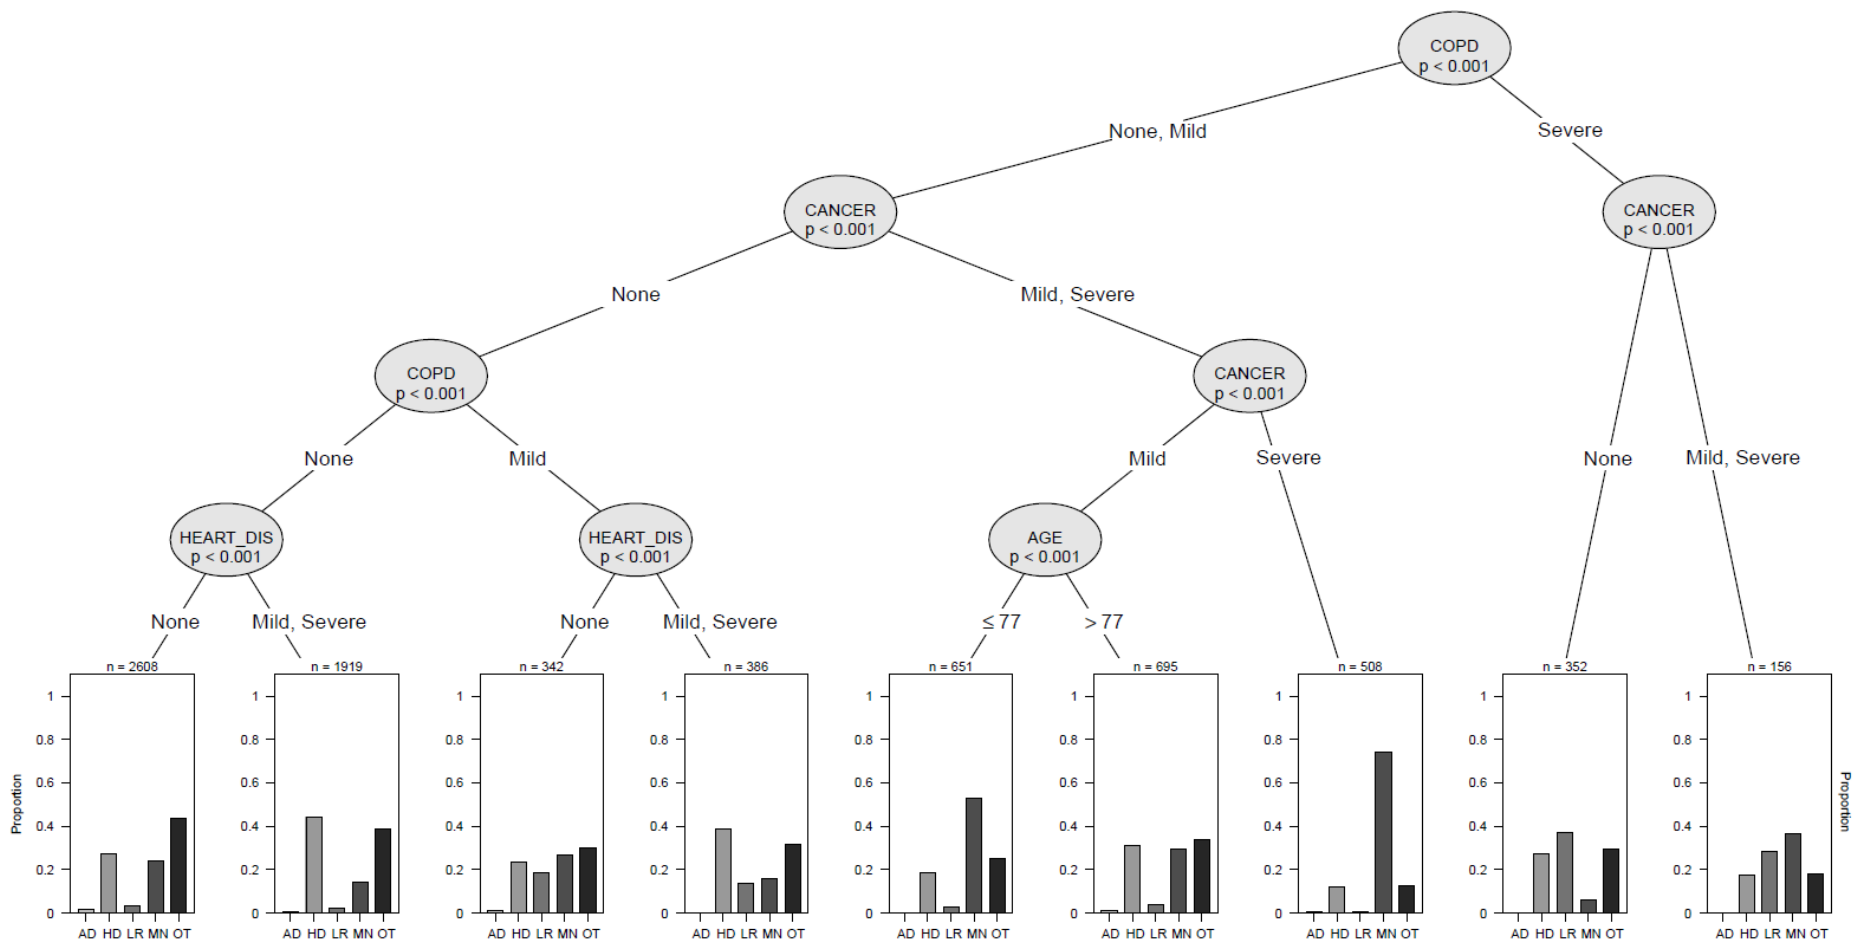

Abbreviations: AD = Alzheimer's Disease/Dementia, HD = Heart Diseases, LR = Lower Respiratory Diseases, MN = Malignant Neoplasms, OT = Other Causes.

**Table S1: Heart disease and cancer subcategories of underlying cause of death by cognitive impairment**

|                                          | None  |      | Mild |      | Mod/Sev |      |
|------------------------------------------|-------|------|------|------|---------|------|
|                                          | N     | %    | N    | %    | N       | %    |
| Total                                    | 7,617 | 100% | 636  | 100% | 1438    | 100% |
| Diseases of the Heart                    | 1770  | 23%  | 143  | 22%  | 345     | 24%  |
| Chronic ischemic heart disease (not AMI) | 822   | 11%  | 54   | 8%   | 163     | 11%  |
| Acute Myocardial Infarction              | 395   | 5%   | 25   | 4%   | 80      | 6%   |
| Heart failure                            | 144   | 2%   | 24   | 4%   | 37      | 3%   |
| All other heart disease                  | 409   | 5%   | 40   | 6%   | 65      | 5%   |
| Malignant Neoplasms                      | 1653  | 22%  | 75   | 12%  | 113     | 8%   |
| Cancer of lung, bronchus, or trachea     | 494   | 6%   | 21   | 3%   | 20      | 1%   |
| Cancer of colon, rectum, or anus         | 140   | 2%   | <10  | *    | 13      | 1%   |
| Cancer of pancreas                       | 115   | 2%   | <10  | *    | <10     | *    |
| Cancer of prostate                       | 99    | 1%   | <10  | *    | 13      | 1%   |
| Cancer of breast                         | 96    | 1%   | <10  | *    | <15     | *    |
| All other cancer                         | 709   | 9%   | 27   | 4%   | 47      | 3%   |

Note: Exact counts for cells with <10 observations are masked along with the corresponding percentage. The cell for breast cancer among moderate/severe cognitive impairment is also masked (<15) to make calculation of other masked cells in the column impossible.

**Table S2: Top 10 associated causes of death by cognitive status**

|    | No Cognitive Impairment           |      |       | Mild Cognitive Impairment         |     |       | Moderate/severe Cog. Impairment   |      |       |
|----|-----------------------------------|------|-------|-----------------------------------|-----|-------|-----------------------------------|------|-------|
|    | Cause of death                    | N    | %     | Cause of death                    | N   | %     | Cause of death                    | N    | %     |
| 1  | Diseases of Heart                 | 6064 | 29.1% | Disease of Heart                  | 507 | 29.2% | Diseases of Heart                 | 1071 | 28.1% |
| 2  | Malignant Neoplasm                | 2670 | 12.8% | Malignant Neoplasm                | 155 | 8.9%  | AD/Dementia                       | 237  | 18.0% |
| 3  | Chronic Lower Respiratory Disease | 1009 | 4.8%  | Cerebrovascular                   | 107 | 6.2%  | Cerebrovascular                   | 221  | 12.0% |
| 4  | Hypertension                      | 862  | 4.2%  | Diabetes                          | 69  | 4.0%  | Hypertension                      | 194  | 9.6%  |
| 5  | Nephritis                         | 788  | 3.8%  | Hypertension                      | 68  | 3.9%  | Malignant Neoplasms               | 185  | 7.9%  |
| 6  | Cerebrovascular                   | 785  | 3.8%  | Influenza & pneumonia             | 63  | 3.6%  | Influenza & Pneumonia             | 142  | 5.0%  |
| 7  | Diabetes                          | 785  | 3.8%  | Chronic Lower Respiratory Disease | 57  | 3.3%  | Diabetes                          | 136  | 3.5%  |
| 8  | Influenza and Pneumonia           | 574  | 2.8%  | Nephritis                         | 48  | 2.8%  | Nephritis                         | 135  | 3.2%  |
| 9  | Septicemia                        | 486  | 2.3%  | AD/Dementia                       | 33  | 1.9%  | Chronic Lower Respiratory Disease | 124  | 3.1%  |
| 10 | Unintentional Injuries            | 297  | 1.4%  | Septicemia                        | 30  | 1.7%  | Septicemia                        | 88   | 2.8%  |
|    | All other                         | 6475 | 31.1% | All other                         | 600 | 34.5% | All other                         | 1553 | 38.0% |

Note: This table tabulates all of the multiple causes listed on each death record. Therefore, there are multiple causes per person, and the N's in this table do not match the N's in the study population.
